1 **Inhibition of thrombocyte activation restores protective immunity to**  
2 **mycobacterial infection**

3 Elinor Hortle<sup>1</sup>, Khelsey E. Johnson<sup>2</sup>, Matt D. Johansen<sup>1</sup>, Tuong Nguyen<sup>1</sup>, Jordan A. Shavit<sup>3</sup>,  
4 Warwick J. Britton<sup>1,4</sup>, David M. Tobin<sup>2</sup>, Stefan H. Oehlers<sup>1,4</sup> \*

5

6 <sup>1</sup> Tuberculosis Research Program, Centenary Institute, University of Sydney, Camperdown,  
7 NSW 2050, Australia

8 <sup>2</sup> Department of Molecular Genetics and Microbiology, Duke University School of Medicine,  
9 Durham, NC 27710, USA

10 <sup>3</sup> Department of Pediatrics and Cellular and Molecular Biology Program, University of  
11 Michigan, Ann Arbor, MI 48107, USA

12 <sup>4</sup> Central Clinical School and Marie Bashir Institute, The University of Sydney,  
13 Camperdown, NSW 2050, Australia

14 \* Corresponding author email: [s.oehlers@centenary.org.au](mailto:s.oehlers@centenary.org.au), Twitter: @oehlerslab

15

16 **Summary**

17 Infection-induced thrombocytosis is a clinically important complication of tuberculosis  
18 infection. Recent studies have highlighted the utility of aspirin as a host-directed therapy  
19 modulating the inflammatory response to infection, but have not investigated the possibility  
20 that the effect of aspirin is related to an anti-platelet mode of action. Here we utilise the  
21 zebrafish-*Mycobacterium marinum* model to show mycobacteria drive host haemostasis  
22 through the formation of granulomas. Treatment of infected zebrafish with aspirin markedly  
23 reduced mycobacterial burden. This effect is reproduced by treatment with platelet-specific  
24 glycoprotein IIb/IIIa inhibitors demonstrating a detrimental role for infection-induced  
25 thrombocyte activation. We find that the reduction in mycobacterial burden is dependent on

26 macrophages and granuloma formation providing the first *in vivo* experimental evidence that  
27 infection-induced platelet activation compromises protective host immunity to mycobacterial  
28 infection. Our study illuminates platelet activation as an efficacious target of aspirin, a widely  
29 available and affordable host-directed therapy candidate for tuberculosis.

30

### 31 **Keywords**

32 Mycobacterial infection, haemostasis, innate immunity, clotting

33

### 34 **Introduction**

35 *Mycobacterium tuberculosis* is the world's most lethal pathogen, causing nearly 2 million  
36 deaths each year (World Health Organization. and Global Tuberculosis Programme.). The  
37 increasing incidence of both multi- and extremely-drug resistant tuberculosis (TB) urgently  
38 require the development of therapeutics that overcome the shortcomings of conventional  
39 antibiotics. Pathogenic mycobacteria co-opt numerous host pathways to establish persistent  
40 infection, and subversion of these interactions with host-directed therapies (HDTs) has been  
41 shown to reduce the severity of infection in animal models. For example, we have recently  
42 shown that mycobacteria induce host angiogenesis and increase host vascular permeability;  
43 blockade of either of these processes reduced both the growth and spread of bacteria (Oehlers  
44 et al., 2017; Oehlers et al., 2015). Therefore, host processes co-opted by the bacteria provide  
45 attractive targets for novel TB treatments. One such pathway may be haemostasis.

46

47 Thrombocytosis has long been recognised as a biomarker for advanced TB, and infection is  
48 often accompanied by the induction of a hyper-coagulable state, resulting in increased risk of  
49 deep vein thrombosis and stroke (Kutiyaal et al., 2017; Robson et al., 1996). Recent evidence  
50 hints that mycobacteria may drive this process, and that it may aid their growth. For example,

51 cell wall components from *M. tuberculosis* can induce expression of tissue factor - an  
52 important activator of coagulation - in macrophages (Kothari et al., 2012). In mice and  
53 humans markers of platelet activation are upregulated during *M. tuberculosis* infection (Fox  
54 et al., 2018), and it has been shown *in vitro* that interaction with activated platelets increases  
55 the conversion of infected macrophages into cells permissive for bacterial growth (Feng et  
56 al., 2014; Fox et al., 2018). To date the pathogenic roles of haemostasis have not been studied  
57 in an intact *in vivo* model of mycobacterial infection.

58

59 Here we used the zebrafish-*M. marinum* model to investigate the role of host thrombocytes in  
60 mycobacterial infection. We show evidence that coagulation and thrombocyte activation are  
61 both driven by mycobacteria, and that infection-induced activation of thrombocytes  
62 compromises protective immunity. However, clot formation itself has no effect on infection  
63 suggesting direct communication between the mycobacterial infection milieu and  
64 thrombocytes.

65

66

## 67 **Results**

68

### 69 ***Mycobacterium marinum* induces coagulation in zebrafish.**

70

71 To determine if *M. marinum* induces coagulation in zebrafish, we infected *Tg(fabp10a:fgb-*  
72 *EGFP)* transgenic embryos expressing EGFP-tagged fibrinogen beta (FGB) with *M.*  
73 *marinum*-tdtomato, and imaged the developing infection every 15 minutes from 3 days post  
74 infection (DPI), until 6 DPI (Supplementary Video 1). We observed that clots formed only at  
75 areas of bacterial growth, and that the size of the clots increased as the number of bacteria

76 increased over the course of the infection (Figure 1A). When we infected fish with  $\Delta$ ESX1  
77 mutant *M. marinum*, which lacks the ability to export key virulence proteins and does not  
78 form granulomas, significantly reduced clot formation was observed (Figures 1B-C).  
79 Together, these data demonstrate that coagulation is a conserved consequence of infection  
80 driven by pathogenic mycobacteria across host species. Treatment with the anti-coagulant  
81 warfarin to prevent clot formation during infection did not affect bacterial burden, suggesting  
82 coagulation does not affect bacterial growth within the host (Figures 1D-E and S1).

83

#### 84 ***Mycobacterium marinum* induces thrombosis in zebrafish.**

85

86 To determine if *M. marinum* induces thrombosis in zebrafish, we infected *Tg(cd41:GFP)*  
87 embryos, where thrombocytes are marked by GFP expression, with red fluorescent  
88 *M. marinum*. Infected embryos had significantly increased density of thrombocytes around  
89 the tail venous plexus where granulomas preferentially form (Figures 1F and S1A-B).  
90 Amongst infected embryos, there was a strong positive correlation between thrombocyte  
91 density and mycobacterial burden (Figure S1C). This increased thrombocyte density, and the  
92 positive correlation between density and burden, were also observed in  $\Delta$ ESX1 mutant  
93 *M. marinum* infection (Figures S1D-E), indicating that mycobacteria-induced thrombosis is  
94 ESX1 independent.

95

96 Because the *cd41* promoter is active in non-motile thrombocyte precursors within their  
97 caudal haematopoietic tissue, we could not conclusively determine if these thrombocytes had  
98 actively migrated to and been retained at the site of infection (Lin et al., 2005). To determine  
99 if zebrafish thrombocytes are recruited to sites of mycobacterial infection, we performed  
100 trunk injection of *M. marinum* in *Tg(cd41:GFP)* at 3 days post fertilization (DPF), a time  
101 point after which mature thrombocytes are in the circulation. Embryos were then imaged at 2,

102 3, and 4 DPI. Thrombocytes were co-localised with the sites of infection in 87% of fish.  
103 Rather than forming a stable and growing clot over a period of days (as we observed for  
104 FGB), thrombocytes appeared to form transient associations with sites of infection (Figure  
105 S3). In some instances, new thrombocytes seemed to be retained at sites of infection in  
106 different locations each day, and in others, thrombocytes appeared to stay stationary for  
107 multiple days (Figure S3). The size of infection-associated thrombocytes varied greatly,  
108 suggesting activation and progressive degranulation or death of thrombocytes at sites of  
109 infection. Thrombocytes were most often observed on the edges of granulomas consistent  
110 with the location of granuloma-defining macrophages (Cronan et al., 2016). Therefore  
111 thrombocyte-granuloma interactions appear to be a conserved feature of mycobacterial  
112 infection across species.

113

#### 114 **Anti-platelet drugs reduce mycobacterial burden in zebrafish.**

115

116 To determine if the previously reported infection-controlling effect of aspirin is conserved  
117 across vertebrate species (Mai et al., 2018), we treated *M. marinum*-infected fish with aspirin  
118 by immersion. Mycobacterial burden was reduced by approximately 50% in aspirin-treated  
119 embryos (Figure 2A).

120

121 Although aspirin is a widely used platelet inhibitor, it is a broadly acting nonsteroidal anti-  
122 inflammatory drug that is known to modulate infection-relevant prostaglandin metabolism.  
123 Thus, to determine if the anti-platelet effects of aspirin treatment contribute to the reduced  
124 mycobacterial burden, we treated *M. marinum*-infected fish with the platelet-specific, small  
125 molecule Glycoprotein IIb/IIIa inhibitors, tirofiban or eptifibatide. Treatment with either  
126 Glycoprotein IIb/IIIa inhibitor phenocopied aspirin by reducing bacterial burden providing

127 the first direct evidence of a detrimental role for platelet activation in the immune response to  
128 mycobacterial infection (Figure 2B-C).

129

130 Surprisingly, tirofiban treatment resulted in significantly higher number of visible  
131 thrombocytes at sites of infection compared to controls (Figures 2D-E). This suggests that, in  
132 contrast to our observations in the tail wound thrombosis model, tirofiban does not inhibit  
133 thrombocyte migration to areas of bacterial infection, but may act by preventing activation  
134 and subsequent degranulation or death of zebrafish thrombocytes in response to  
135 mycobacterial infection.

136

137 We next examined the cellular target of anti-platelet drugs in our infection system. We  
138 performed antibacterial testing of the anti-platelet drugs in axenic cultures of *M. marinum*  
139 and did not observe any effect on bacterial growth *in vitro* demonstrating host-directed  
140 activity (Figure 2F).

141

142 The specificity of anti-platelet drugs against mycobacterial infection was tested in acute  
143 *Pseudomonas aeruginosa* infection. Treatment of *P. aeruginosa*-infected embryos with either  
144 class of anti-platelet drug did not affect survival demonstrating specificity against chronic  
145 mycobacterial infection (Figure 2G).

146

#### 147 **The anti-bacterial effect of anti-platelet drugs is thrombocyte dependent.**

148 We next confirmed that anti-platelet drugs inhibit thrombocyte activation in zebrafish using a  
149 tail wound thrombosis assay (Figure S4A). Anti-platelet drugs reduced the number of  
150 thrombocytes recruited to tail wound clots demonstrating conservation of cellular target in  
151 zebrafish embryos (Figure S4B-C). Of the two Glycoprotein IIb/IIIa inhibitors tirofiban and

152 eptifibatide, tirofiban is the more stable small molecule. Therefore we chose to use tirofiban for  
153 inhibition of thrombocytes in all further experiments.

154

155 To determine if zebrafish thrombocytes are the conserved target for tirofiban in the zebrafish-  
156 *M. marinum* infection model, we inhibited thrombopoiesis by injection with a morpholino  
157 against the thrombopoietin receptor *cmpl* (Lin et al., 2005). Surprisingly, inhibition of  
158 thrombopoiesis did not affect the outcome of infection. However, tirofiban treatment failed to  
159 reduce bacterial burden in thrombocyte-depleted embryos, demonstrating thrombocytes are  
160 the cellular target of this drug in the zebrafish infection model (Figure 3A).

161

162 To confirm that tirofiban was acting specifically through inhibition of Glycoprotein IIb/IIIa, we  
163 performed infection experiments in Glycoprotein IIb/IIIa knock-out (KO) transgenic embryos  
164 (*itga2b* mutants). The *itga2b*<sup>sa10134</sup> allele caused a dose-dependent reduction in thrombocytes  
165 recruited to tail wound clots (Figure S4A). As with *cmpl* knockdown, complete KO of *itga2b*  
166 had no effect on bacterial burden (Figure 3F), and thrombocyte accumulation at the site of  
167 infection was also unaffected (Figures S4B-C). However, heterozygous embryos phenocopied  
168 tirofiban treatment, showing a trend to reduced bacterial burden and increased thrombocyte  
169 accumulation (Figures 3B and S4B-C). This suggests that treatment with tirofiban may only  
170 partially inhibit Glycoprotein IIb/IIIa in our model.

171

172 **Thrombocyte activation and coagulation are independently induced by mycobacterial**  
173 **infection.**

174

175 We hypothesised that infection-induced coagulation and the resulting fibrin deposition in clots  
176 would activate thrombocytes through fibrin cross-linking. To investigate this hypothesis, we

177 again used warfarin, which prevented clot formation during infection and did not affect bacterial  
178 burden (Figure 1E). However, the addition of warfarin to our tirofiban treatment model had no  
179 effect on the ability of tirofiban to reduce bacterial burden (Figure 3C).

180

181 To discount the possibility that warfarin and tirofiban co-treatment resulted in non-specific  
182 toxicity, we utilised a *fibrinogen alpha chain* mutant zebrafish line that does not readily form  
183 clots. Tirofiban treatment of FGA mutant zebrafish still significantly reduced bacterial burden  
184 further demonstrating that infection-induced activation of coagulation is not upstream of  
185 thrombocyte activation by mycobacterial infection (Figure 3D).

186

187 Conversely, we next asked if thrombocyte activation contributes to infection-induced  
188 coagulation. Analysis of FGB-GFP clots in tirofiban-treated embryos revealed reduced total clot  
189 formation (Figure 3E). However, correction for relative bacterial burden revealed that the  
190 reduced clot formation was a burden-dependent and thrombus formation was not additionally  
191 impacted by tirofiban treatment (Figure 3F).

192

193 **Thrombocyte activation compromises immunity through granuloma-associated**  
194 **macrophages.**

195

196 To further delineate the mechanism by which thrombocyte activation compromises innate  
197 immune control of mycobacterial infection but not the response to *Pseudomonas* infection, we  
198 asked if granuloma formation and maturation is essential to pathological thrombocyte activation.

199

200 To examine the requirement of granuloma formation and necrosis for thrombocyte-inhibiting  
201 drug efficacy, we infected embryos with  $\Delta$ ESX1 *M. marinum* that are unable to drive granuloma



202 maturation or necrosis. Tirofiban treatment had no effect on mutant bacterial burden at 5 DPI  
203 (Figure 4A). Similarly, in embryos infected with *M. marinum* at a dose too low to form necrotic  
204 granulomas by 5 DPI, continuous tirofiban treatment had no effect on bacterial burden at 5 DPI  
205 (Figure S6A).

206

207 We next took advantage of the stereotypical progression of innate immune granulomas in  
208 zebrafish embryos to investigate the temporal activity of thrombocyte inhibition by tirofiban.  
209 We found that at 3 DPI, a time-point with nascent granuloma formation but prior to significant  
210 granuloma organisation and necrosis, tirofiban had no effect on bacterial burden (Figure 4B).  
211 Conversely, treatment of infection from 4 to 5 DPI, a time-point when granulomas are organised  
212 and start to become necrotic, tirofiban significantly reduced bacterial burden within 24 hours  
213 (Figure 4C).

214

215 Macrophages are key cells in the innate granuloma, therefore to determine if thrombocyte  
216 inhibition exerts a protective effect through boosting macrophage-dependent immunity, we to  
217 depleted macrophages. We injected clodronate liposomes to deplete macrophages early during  
218 granuloma formation at 3 DPI (Figure S6B-C). Anti-platelet drug treatment was started  
219 immediately after liposome injection. In macrophage-depleted fish tirofiban did not reduce  
220 bacterial burden (Figure 4D).

221

222 It has previously been shown that in the presence of mycobacteria *in vitro*, platelets  
223 accelerate the conversion of macrophages to foam cells, which are permissive for  
224 mycobacterial growth, suggesting a mechanism for infection-induced thrombocytosis to  
225 compromise innate immunity to mycobacterial infection (Feng et al., 2014). We therefore  
226 hypothesised that thrombocyte inhibition would reduce the conversion of macrophages into

227 foam cells. We investigated this by performing Oil-red O staining to measure lipid  
228 accumulation within individual granulomas (Figure 4E). Because tirofiban treatment reduced  
229 bacterial burden, Oil-red O density was only compared between size-matched granulomas in  
230 treatment group. Tirofiban-treated embryos had significantly less Oil-red O accumulation in  
231 their granulomas when compared to DMSO control, even after correction for reduced  
232 bacterial burden (Figure 4F). Together, these data demonstrate an *in vivo* effect of  
233 thrombocyte activation inhibiting an effective immune response by converting macrophages  
234 into foam cells in mycobacterial granuloma.

235

236 Given that foam cell formation is closely associated with necrosis in tuberculosis (Russell et  
237 al., 2009) we hypothesised that tirofiban treatment would reduce cell death within the  
238 granuloma. We therefore used TUNEL staining to detect the fragmented DNA of dying cells  
239 in *M. marinum* infected embryos. At 5 DPI, tirofiban-treated embryos showed significantly  
240 less TUNEL staining, indicating significantly reduced cell death within the granuloma  
241 (Figures 4G-H). Together these results indicate that infection-induced platelet activation  
242 aggravates a basal rate of macrophage cell death in the granuloma.

243

## 244 **Discussion**

245

246 Here we have used the zebrafish-*M. marinum* model to identify infection-induced  
247 haemostasis as a detrimental host response that is co-opted by pathogenic mycobacteria. Our  
248 data builds on previous studies that have shown coagulation, thrombocytosis and  
249 thrombocyte activation are associated with mycobacterial infection, and provide the first *in*  
250 *vivo* study to demonstrate a direct role for thrombocyte activation in promoting mycobacterial  
251 growth. We have shown that infection-induced haemostasis is conserved in the zebrafish-*M.*

252 *marinum* infection model, and that the platelet inhibiting drugs, aspirin, tirofiban, and  
253 eptifibatide, are able to reduce bacterial burden, independently of effects on coagulation,  
254 through host-mediated effects (Graphical abstract).

255

256 A number of studies have investigated aspirin as a possible adjunctive treatment for TB in  
257 both mice and humans (reviewed in (Hawn et al., 2013; Kalantri and Kalantri, 2018; Kroesen  
258 et al., 2017; Kroesen et al., 2018)). The results of these studies have been far from  
259 conclusive, with some finding beneficial effects, others finding no effect, and still others  
260 finding aspirin may reduce the effectiveness of anti-tubercular drugs. This lack of consensus  
261 may be due to the fact that NSAIDs affect many cell types and processes important for the  
262 host response to mycobacterial infection, not just coagulation and platelet activation. Our  
263 study expands this literature by demonstrating a significant reduction in mycobacterial burden  
264 following treatment with two specific anti-platelet drugs, tirofiban and eptifibatide, in addition to  
265 aspirin.

266

267 Our study found that coagulation and thrombocytes are independently activated by infection  
268 and have distinct roles during the pathogenesis of mycobacterial infection of zebrafish.  
269 Inhibiting coagulation alone did not significantly reduce bacterial burden, and therefore we  
270 considered anti-platelet treatment as a more attractive HDT than anti-coagulant treatment.  
271 Although we found lower total clot formation in tirofiban-treated embryos, this was only  
272 proportional to bacterial load, suggesting infection-induced coagulation could be independent of  
273 infection-induced thrombocyte activation. It must be noted that we only measure a simple single  
274 end-point in our zebrafish embryo experiments (bacterial load) at a relatively early time point for  
275 a chronic infection. In more complex animals, where stroke and DVT are important secondary  
276 complications of mycobacterial infection, reducing coagulation may yet prove to be efficacious

277 as a HDT during TB therapy to reduce morbidity. Conversely, data from the mouse model of TB  
278 suggests tissue factor-induced fibrin is necessary to contain mycobacteria within granulomas  
279 (Venkatasubramanian et al., 2016).

280

281 Our study provides evidence that infection-induced haemostasis is a conserved function of  
282 the core mycobacterial pathogenicity program centred around granuloma formation. Our  
283 experiments with  $\Delta$ ESX1 mutant *M. marinum*, which cannot secrete key virulence proteins  
284 that drive granuloma formation, demonstrated ESX1-dependent haemostasis and  
285 responsiveness to growth restriction by platelet inhibiting drugs. These data fit well with our  
286 observations that stationary thrombocytes were only observed around well-developed  
287 mycobacterial granulomas, and platelet inhibition was only effective at reducing bacterial  
288 burden after the development of significant granuloma pathology. Together these results point  
289 to a bidirectional relationship between thrombocyte activation and granuloma maturation  
290 (Figure 6).

291

292 Interestingly we observed that tirofiban treatment increased the number of thrombocytes  
293 accumulated at sites of infection. This may represent increased migration, increased  
294 accumulation through coagulation or decreased activation and subsequent  
295 degranulation/death. Given tirofiban blocks the glycoprotein IIb/IIIa integrin - on which  
296 platelet migration is dependent (Gaertner et al., 2017) - and we observed that tirofiban  
297 reduced migration of thrombocytes in our tail wound model, we do not consider that  
298 increased migration is likely to be responsible. Similarly, an increase in coagulation  
299 ‘trapping’ thrombocytes at the site of infection is not supported by our experiments in  
300 *Tg(fabp10a:fgb-EGFP)* transgenic embryos. We therefore propose that this ‘increase’  
301 actually represents a decrease in thrombocyte activation. Previous research has shown that

302 infection-activated platelets can undergo phagocytosis and/or apoptosis (Feng et al., 2014;  
303 Gaertner et al., 2017; Hottz et al., 2014); both of these processes would result in the loss of  
304 visible GFP<sup>+</sup> thrombocytes from our system.

305

306 Recent research has highlighted the important role of platelets as innate immune cells; they  
307 are able to release anti-microbial peptides, pick up and ‘bundle’ bacteria, and initiate the  
308 recruitment of other innate immune cells to sites of infection (Gaertner et al., 2017; Li et al.,  
309 2017; Morrell et al., 2014). The low frequency at which direct thrombocyte-mycobacterial  
310 interactions were observed in our study argues against thrombocytes having a significant role in  
311 directly mediating immunity to mycobacterial infection. Our experiments demonstrating  
312 macrophage-dependence for anti-platelet drug mediated control of infection and reduced lipid  
313 accumulation in the granuloma suggest that infection-induced thrombocyte activation  
314 modulates macrophage containment of infection.

315

316 Our study joins several *in vitro* studies that have shown platelets can induce macrophages to  
317 have differential responses to bacteria or other pathologic stimuli. In the presence of  
318 *S. aureus*, thrombin-activated platelets induce macrophages to increase phagocytosis and  
319 slow the growth of bacteria (Ali et al., 2017). Conversely, platelets can suppress the  
320 macrophage response to LPS (Ando et al., 2016), and induce macrophages to produce less  
321 TNF, more IL-10, and more IL-1 $\beta$  in response to both BCG and *M. tuberculosis* (Feng et al.,  
322 2014; Fox et al., 2018). Crucially it has been shown that platelets are necessary for the  
323 formation of foam cells in the context of mycobacterial infection and atheroma (Feng et al.,  
324 2014). Our experiments with both Oil Red O and TUNEL staining demonstrate that  
325 thrombocytes induce similar pathways *in vivo* in response to *M. marinum*; directing  
326 macrophages towards foam-cell formation and necrosis.

327

328 Here we used the zebrafish-*M.marinum* model to show that mycobacteria drive coagulation  
329 and thrombosis through the formation of granulomas. We found that inhibition of  
330 thrombocyte activation was able to reduce foam-cell formation and cell death within the  
331 granuloma, leading to dramatically reduced bacterial burden. This is the first *in*  
332 *vivo* experimental evidence that infection-induced platelet activation contributes to the  
333 pathogenesis of mycobacterial infection. Our study identifies platelet activation as a potential  
334 target for tuberculosis host-directed therapy.

335

### 336 **Acknowledgements**

337 We thank Dr Kristina Jahn and Sydney Cytometry for assistance with imaging equipment;  
338 Garvan Biological Testing Facility staff Ms Jennifer Brand, Mr Michael Pickering, Ms Rola  
339 Bazzi, Dr Lucie Nedved and Dr Stephanie Allison at the Garvan Institute of Medical  
340 Research for maintenance of zebrafish breeding stock; and Professors Lalita Ramakrishnan,  
341 Shaun Jackson and Georges Grau, Associate Professor Carl Feng and Dr Jorn Coers for  
342 helpful discussion of results.

343

344 This work was supported by the Australian National Health and Medical Research Council  
345 APP1099912 and APP1053407; University of Sydney Fellowship; NSW Ministry of Health  
346 under the NSW Health Early-Mid Career Fellowships Scheme; and the Kenyon Family  
347 Inflammation Award (S.H.O.), Duke Summer Research Opportunities Program (K.J.), NIH  
348 Director's New Innovator Award 1DP2-OD008614 (D.M.T), NIH R01-HL124232 and R01-  
349 HL125774 (J.A.S.).

350

### 351 **Author contributions**

352 E.H., D.M.T. and S.H.O designed the experiments. E.H., K.E.J., M.D.J., T.N. and S.H.O  
353 performed the experiments. J.A.S. generated transgenic and mutant zebrafish lines. E.H. and  
354 S.O. wrote the paper. W.J.B., D.M.T. and S.H.O. supervised the project.

355

#### 356 **Declaration of Interests**

357 The authors declare no competing interests.

358

359

360

#### 361 **References**

- 362 Ali, R.A., Wuescher, L.M., Dona, K.R., and Worth, R.G. (2017). Platelets Mediate Host  
363 Defense against *Staphylococcus aureus* through Direct Bactericidal Activity and by  
364 Enhancing Macrophage Activities. *J Immunol* 198, 344-351.
- 365 Ando, Y., Oku, T., and Tsuji, T. (2016). Platelets attenuate production of cytokines and nitric  
366 oxide by macrophages in response to bacterial endotoxin. *Platelets* 27, 344-350.
- 367 Cronan, M.R., Beerman, R.W., Rosenberg, A.F., Saelens, J.W., Johnson, M.G., Oehlers,  
368 S.H., Sisk, D.M., Jurcic Smith, K.L., Medvitz, N.A., Miller, S.E., *et al.* (2016). Macrophage  
369 Epithelial Reprogramming Underlies Mycobacterial Granuloma Formation and Promotes  
370 Infection. *Immunity* 45, 861-876.
- 371 Feng, Y., Dorhoi, A., Mollenkopf, H.J., Yin, H., Dong, Z., Mao, L., Zhou, J., Bi, A., Weber,  
372 S., Maertzdorf, J., *et al.* (2014). Platelets direct monocyte differentiation into epithelioid-like  
373 multinucleated giant foam cells with suppressive capacity upon mycobacterial stimulation. *J*  
374 *Infect Dis* 210, 1700-1710.

375 Fox, K.A., Kirwan, D.E., Whittington, A.M., Krishnan, N., Robertson, B.D., Gilman, R.H.,  
376 Lopez, J.W., Singh, S., Porter, J.C., and Friedland, J.S. (2018). Platelets Regulate Pulmonary  
377 Inflammation and Tissue Destruction in Tuberculosis. *Am J Respir Crit Care Med*.  
378 Gaertner, F., Ahmad, Z., Rosenberger, G., Fan, S., Nicolai, L., Busch, B., Yavuz, G.,  
379 Luckner, M., Ishikawa-Ankerhold, H., Hennel, R., *et al.* (2017). Migrating Platelets Are  
380 Mechano-scavengers that Collect and Bundle Bacteria. *Cell* *171*, 1368-1382 e1323.  
381 Hawn, T.R., Matheson, A.I., Maley, S.N., and Vandal, O. (2013). Host-directed therapeutics  
382 for tuberculosis: can we harness the host? *Microbiol Mol Biol Rev* *77*, 608-627.  
383 Hottz, E.D., Medeiros-de-Moraes, I.M., Vieira-de-Abreu, A., de Assis, E.F., Vals-de-Souza,  
384 R., Castro-Faria-Neto, H.C., Weyrich, A.S., Zimmerman, G.A., Bozza, F.A., and Bozza, P.T.  
385 (2014). Platelet activation and apoptosis modulate monocyte inflammatory responses in  
386 dengue. *J Immunol* *193*, 1864-1872.  
387 Johansen, M.D., Kasparian, J.A., Hortle, E., Britton, W.J., Purdie, A.C., and Oehlers, S.H.  
388 (2018). *Mycobacterium marinum* infection drives foam cell differentiation in zebrafish  
389 infection models. *bioRxiv*.  
390 Kalantri, A., and Kalantri, S. (2018). Can aspirin help? *Elife* *7*.  
391 Kothari, H., Rao, L.V., Vankayalapati, R., and Pendurthi, U.R. (2012). *Mycobacterium*  
392 tuberculosis infection and tissue factor expression in macrophages. *PLoS ONE* *7*, e45700.  
393 Kroesen, V.M., Groschel, M.I., Martinson, N., Zumla, A., Maeurer, M., van der Werf, T.S.,  
394 and Vilaplana, C. (2017). Non-Steroidal Anti-inflammatory Drugs As Host-Directed Therapy  
395 for Tuberculosis: A Systematic Review. *Front Immunol* *8*, 772.  
396 Kroesen, V.M., Rodriguez-Martinez, P., Garcia, E., Rosales, Y., Diaz, J., Martin-Cespedes,  
397 M., Tapia, G., Sarrias, M.R., Cardona, P.J., and Vilaplana, C. (2018). A Beneficial Effect of  
398 Low-Dose Aspirin in a Murine Model of Active Tuberculosis. *Front Immunol* *9*, 798.



399 Kutiyal, A.S., Gupta, N., Garg, S., and Hira, H.S. (2017). A Study of Haematological and  
400 Haemostasis Parameters and Hypercoagulable State in Tuberculosis Patients in Northern  
401 India and the Outcome with Anti-Tubercular Therapy. *Journal of clinical and diagnostic*  
402 *research : JCDR 11*, OC09-OC13.

403 Li, J.L., Zarbock, A., and Hidalgo, A. (2017). Platelets as autonomous drones for hemostatic  
404 and immune surveillance. *J Exp Med*.

405 Lin, H.F., Traver, D., Zhu, H., Dooley, K., Paw, B.H., Zon, L.I., and Handin, R.I. (2005).  
406 Analysis of thrombocyte development in CD41-GFP transgenic zebrafish. *Blood 106*, 3803-  
407 3810.

408 Mai, N.T., Dobbs, N., Phu, N.H., Colas, R.A., Thao, L.T., Thuong, N.T., Nghia, H.D., Hanh,  
409 N.H., Hang, N.T., Heemskerk, A.D., *et al.* (2018). A randomised double blind placebo  
410 controlled phase 2 trial of adjunctive aspirin for tuberculous meningitis in HIV-uninfected  
411 adults. *eLife 7*.

412 Matty, M.A., Oehlers, S.H., and Tobin, D.M. (2016). Live Imaging of Host-Pathogen  
413 Interactions in Zebrafish Larvae. *Methods Mol Biol 1451*, 207-223.

414 Morrell, C.N., Aggrey, A.A., Chapman, L.M., and Modjeski, K.L. (2014). Emerging roles for  
415 platelets as immune and inflammatory cells. *Blood 123*, 2759-2767.

416 Oehlers, S.H., Cronan, M.R., Beerman, R.W., Johnson, M.G., Huang, J., Kontos, C.D., Stout,  
417 J.E., and Tobin, D.M. (2017). Infection-induced vascular permeability aids mycobacterial  
418 growth. *J Infect Dis 215*, 813-817.

419 Oehlers, S.H., Cronan, M.R., Scott, N.R., Thomas, M.I., Okuda, K.S., Walton, E.M.,  
420 Beerman, R.W., Crosier, P.S., and Tobin, D.M. (2015). Interception of host angiogenic  
421 signalling limits mycobacterial growth. *Nature 517*, 612-615.

422 Passeri, M.J., Cinaroglu, A., Gao, C., and Sadler, K.C. (2009). Hepatic steatosis in response  
423 to acute alcohol exposure in zebrafish requires sterol regulatory element binding protein  
424 activation. *Hepatology* 49, 443-452.

425 Robson, S.C., White, N.W., Aronson, I., Woollgar, R., Goodman, H., and Jacobs, P. (1996).  
426 Acute-phase response and the hypercoagulable state in pulmonary tuberculosis. *Br J*  
427 *Haematol* 93, 943-949.

428 Russell, D.G., Cardona, P.J., Kim, M.J., Allain, S., and Altare, F. (2009). Foamy  
429 macrophages and the progression of the human tuberculosis granuloma. *Nat Immunol* 10,  
430 943-948.

431 Venkatasubramanian, S., Tripathi, D., Tucker, T., Paidipally, P., Cheekatla, S., Welch, E.,  
432 Raghunath, A., Jeffers, A., Tvinnereim, A.R., Schechter, M.E., *et al.* (2016). Tissue factor  
433 expression by myeloid cells contributes to protective immune response against  
434 *Mycobacterium tuberculosis* infection. *Eur J Immunol* 46, 464-479.

435 Vo, A.H., Swaroop, A., Liu, Y., Norris, Z.G., and Shavit, J.A. (2013). Loss of fibrinogen in  
436 zebrafish results in symptoms consistent with human hypofibrinogenemia. *PLoS ONE* 8,  
437 e74682.

438 Walton, E.M., Cronan, M.R., Beerman, R.W., and Tobin, D.M. (2015). The Macrophage-  
439 Specific Promoter *mfap4* Allows Live, Long-Term Analysis of Macrophage Behavior during  
440 *Mycobacterial* Infection in Zebrafish. *PLoS ONE* 10, e0138949.

441 World Health Organization., and Global Tuberculosis Programme. Global tuberculosis  
442 control : WHO report. (Geneva, Global Tuberculosis Programme), p. 15 volumes.

443

#### 444 **Figure legends**

445 **Figure 1: *Mycobacterium marinum* induces coagulation and thrombosis around sites of**  
446 **infection in zebrafish**

447 A) Representative images of a *Tg(fabp10a:fgb-EGFP)* embryo infected with *M.marinum-*  
448 *tdTomato* by caudal vein injection, showing clot formation (green) at sites of infection (red)  
449 at 3, 4, and 5 DPI. B) Representative images of 5 DPI *Tg(fabp10a:fgb-EGFP)* embryos  
450 infected with *M.marinum-tdTomato* WT and  $\Delta$ ESX1 *M. marinum-td-tomato* ( $\Delta$ ESX1)  
451 showing clot formation (green) at sites of infection (red). Arrows indicate clotting. C)  
452 Quantification of clot formation in burden-matched  $\Delta$ ESX1 mutant-infected *Tg(fabp10a:fgb-*  
453 *EGFP)* embryos normalised to WT *M. marinum* control. Error lines represent mean  $\pm$  SEM,  
454 statistical analysis by T test. Data show combined results from two independent experiments.  
455 D) Representative images of *Tg(fabp10a:fgb-EGFP)* embryos, where clot formation can be  
456 visualised by GFP fluorescence, infected with *M.marinum-tdTomato* (red) and treated with  
457 either DMSO or warfarin. E) Quantification of clotting in warfarin-treated *Tg(fabp10a:fgb-*  
458 *EGFP)* embryos. F) Quantification of bacterial burden in embryos treated with warfarin. Data  
459 are combined results of two independent experiments. F) Representative 2 DPI, 3 DPI and 4  
460 DPI images of *Tg(cd41:GFP)* fish infected with *M.marinum-tdTomato* at 3 DPF. White  
461 arrow heads show thrombocyte (green) association with areas of bacterial growth (red).  
462 Thrombocytes not indicated with an arrow head were circulating and not considered to be  
463 associated with bacteria (more detail available in Figure S2C).

464

465 **Figure 2: Anti-platelet drugs reduce bacterial burden in *M. marinum* infection**

466 A) Quantification of bacterial burden in embryos treated with aspirin normalised to DMSO  
467 control. Data are combined results of two independent experiments. B) Quantification of  
468 bacterial burden in embryos treated with tirofiban normalised to DMSO control. Data are  
469 combined results of two independent experiments. C) Quantification of bacterial burden in  
470 embryos treated with eptifibatide or DMSO control. D) Representative images of  
471 *Tg(cd41:gfp)* embryos treated with tirofiban or DMSO control. E) Quantification of total

472 thrombocyte *Tg(cd41:GFP)* area within the tail of infected larvae treated with tirofiban. F)  
473 Quantification of bacterial growth by relative fluorescence in 7H9 broth culture  
474 supplemented with drugs as indicated. G) Survival analysis of *P. aerogenosa* PA01 infected  
475 embryos treated with anti-platelet drugs as indicated.

476 All graphs show Mean  $\pm$  SEM. Statistical analyses performed by T tests and Log-Rank tests  
477 where appropriate.

478

479 **Figure 3: The anti-bacterial effect of anti-platelet drugs is thrombocyte dependent**

480 A) Total fluorescence area of *M. marinum* bacteria in larvae injected with either control or  
481 cmpl morpholino (MO) to deplete thrombocytes, and then treated with tirofiban (Tiro).  
482 Values are normalised to DMSO-treated control MO larvae. Graphs show the combined  
483 results of 2 independent experiments. B) Quantification of bacterial burden in *itga2b*  
484 mutant embryos normalised to WT control. Data are combined results of four independent  
485 experiments. C) Quantification of bacterial burden in embryos treated with tirofiban,  
486 warfarin, or tirofiban and warfarin, normalised to DMSO control. Data are combined results  
487 of two independent experiments. D) Quantification of bacterial burden in *fga*<sup>-/-</sup> embryos  
488 treated with tirofiban. E) Representative images of 5 DPI *Tg(fabp10a:fgb-EGFP)* embryos  
489 infected with *M.marinum*-tdTomato and treated with either DMSO or tirofiban. F)  
490 Quantification of clotting relative to bacterial burden in embryos treated with tirofiban  
491 normalised to DMSO control. Data are combined results of two independent experiments.

492 All graphs show Mean  $\pm$  SEM. Statistical analyses performed by T tests or ANOVA where  
493 appropriate.

494

495 **Figure 4: Thrombocyte activation compromises immunity through granuloma-associated**  
496 **macrophages.**

497 A) Quantification of bacterial burden in embryos infected with  $\Delta$ ESX1 *M.marinum*-tdTomato  
498 and treated with tirofiban. B) Quantification of bacterial burden at 3 DPI after continuous  
499 tirofiban treatment from 0 DPI. C) Quantification of bacterial burden at 5 DPI after overnight  
500 drug treatment initiated at 4 DPI. D) Quantification of bacterial burden in embryos infected  
501 with *M.marinum*-tdTomato, injected with clodronate liposomes and treated with tirofiban  
502 from at 3 DPI. E) Representative images of bacterial granulomas chosen for analysis  
503 (bacteria are white in greyscale images), and corresponding Oil Red O (ORO) staining (red-  
504 brown in color images). F) Quantification of ORO pixel density relative to granuloma  
505 bacterial area, in embryos treated with tirofiban, normalised to DMSO control. G)  
506 Representative images of bacterial granulomas showing bacteria in red and TUNEL staining  
507 in green. F) Quantification of TUNEL positive area within the largest granuloma of  
508 individual embryos.

509 All graphs show Mean  $\pm$  SEM, statistical tests by T-tests. Data are combined results of two  
510 independent experiments, except D) and H) which represent single experiments.

511

512

### 513 **Graphical abstract.**

514 *M. marinum* induces two independent haemostatic processes in the zebrafish: ESX1  
515 dependent coagulation (1), and ESX1 independent thrombocyte recruitment (2). Bacteria then  
516 induce ESX1 dependent thrombocyte activation - either directly or via the macrophage - (3),  
517 and this leads to foam cell formation and macrophage necrosis, promoting bacterial growth  
518 (4). Inhibition of thrombocyte activation with anti-platelet drugs like Tirofiban, stops this  
519 progression and thereby limits the growth of bacteria. Drugs which reduce coagulation (1)  
520 have no effect on bacterial growth.

521

522

## 523 **Supplementary Figure Legends**

### 524 **Figure S1**

525 Related to Figure 1. Quantification of clot formation in warfarin-treated embryos infected  
526 with *M. marinum*. Error lines represent mean  $\pm$  SEM, statistical analysis by T test.

527

### 528 **Figure S2**

529 Related to Figure 1. A) Representative images of 5 DPI *Tg(cd41:GFP)* embryos infected  
530 with *M.marinum*-tdTomato, showing thrombocyte accumulation (green) at sites of bacterial  
531 infection (red). B) Quantification of total thrombocyte *Tg(cd41:GFP)* area within the tail of  
532 uninfected or WT *M.marinum*-tdTomato infected embryos. C) Correlation between *M.*  
533 *marinum* bacterial burden and total thrombocyte *Tg(cd41:GFP)* area within the tail of  
534 infected embryos. D) Quantification of total thrombocyte *Tg(cd41:GFP)* area within the tail  
535 of uninfected or  $\Delta$ ESX1 *M.marinum*-tdTomato infected larvae at 5 DPI. E) Correlation  
536 between  $\Delta$ ESX1 *M. marinum* bacterial burden and total thrombocyte *Tg (cd41:GFP)* area  
537 within the tail of infected embryos at 5 DPI.

538

### 539 **Figure S3**

540 Related to Figure 1. Images of 2 DPI, 3 DPI and 4 DPI *Tg(cd41:GFP)* embryos infected with  
541 *M.marinum*-tdTomato at 3 DPF. At each time-point, 2 images were taken ~10 seconds apart.  
542 Thrombocytes located in the same position in both images were considered stationary (non-  
543 circulating), and labelled with a white arrow head.

544 Graphs show Mean  $\pm$  SEM, statistical testing by T-test or linear regression.

545

### 546 **Figure S4**

547 Related to Figure 2. A) Representative images of thrombocyte accumulation at tail wound in  
548 4 DPF *Tg(cd41:GFP)* embryos , 4 hours post injury (hpi). B) Quantification of thrombocytes  
549 within 100  $\mu$ m of the cut site 4 hpi in aspirin-treated embryos. C) Quantification of  
550 thrombocytes within 100  $\mu$ m of the cut site 4 hpi in tirofiban-treated embryos.  
551 Graphs show Mean  $\pm$  SEM, statistical testing by T-test (B and C) or ANOVA (D).

552

### 553 **Figure S5**

554 Related to Figure 3. A) Quantification of thrombocytes within 100  $\mu$ m of the cut site 4 hours  
555 after injury in *itga2b* WT, heterozygous and knock-out embryos. B) Representative images of  
556 *Tg(cd41:gfp) itga2b* mutant embryos infected with *M. marinum*-tdTomato. C) Quantification  
557 of total thrombocyte *Tg(cd41:GFP)* area within the tail of infected *itga2b* mutant embryos.

558

### 559 **Figure S6**

560 Related to Figure 4. A) Quantification of bacterial burden in embryos infected with a low  
561 dose of 10-50 fluorescent *M. marinum* and treated with tirofiban. **B)** Representative images  
562 of caudal haematopoietic tissue in 6 DPF *Tg(mfap4:tdTomato)* embryos, where macrophages  
563 are fluorescently labelled, injected with clodronate or PBS liposomes at 4 DPF. **C)**  
564 Quantification of macrophage number by fluorescent pixel count at 5 DPI in embryos  
565 injected with clodronate or PBS liposomes at 3 DPI, and treated with tirofiban. Graphs show  
566 Mean  $\pm$  SEM, statistical tests by T-tests (A and B) or ANOVA (D).

567

### 568 **Methods**

#### 569 *Zebrafish husbandry*

570 Adult zebrafish were housed at the Garvan Institute of Medical Research Biological Testing  
571 Facility (St Vincent's Hospital AWC Approval 1511) and embryos were produced by natural

572 spawning for infection experiments at the Centenary Institute (Sydney Local Health District  
573 AWC Approval 2016-022). Zebrafish embryos were obtained by natural spawning and  
574 embryos were raised at 28°C in E3 media.

575

#### 576 *Zebrafish lines*

577 Wild type zebrafish are the TAB background. Transgenic lines are: *Tg(fabp10a:fgb-*  
578 *EGFP)<sup>mi4001</sup>* referred to as *Tg(fabp10a:fgb-EGFP)(Vo et al., 2013)*, *Tg(-6.0itga2b:eGFP)<sup>la2</sup>*  
579 referred to as *Tg(cd41:EGFP)(Lin et al., 2005)*, *Tg(mfap4:tdTomato)<sup>x12</sup>* referred to as  
580 *Tg(mfap4:tdTomato)(Walton et al., 2015)*, Mutant allele *fga<sup>mi</sup>* contains a 26 bp insertion in  
581 the *fibrinogen alpha chain* gene (manuscript in preparation).

582

#### 583 *Infection of zebrafish embryos*

584 Aliquots of single cell suspensions of midlog-phase *Mycobacterium marinum* M strain,  
585  $\Delta$ ESX1 *M. marinum* and *Pseudomonas aeruginosa* PA01 were frozen at -80°C for use in  
586 infection experiments. Bacterial aliquots were thawed and diluted with phenol red dye (0.5%  
587 w/v). 10-15 nL was injected into the caudal vein or trunk of M-222 (tricaine)-anaesthetised  
588 30-48 hpf embryos resulting in a standard infectious dose ~400 fluorescent *M. marinum*.  
589 Embryos were recovered into E3 supplemented with 0.036 g/L PTU, housed at 28 °C and  
590 imaged on day 5 of infection unless otherwise stated.

591

#### 592 *Drug treatments*

593 Embryos were treated with vehicle control (DMSO or water as appropriate), 10 µg/ml  
594 aspirin, 20 µg/ml tirofiban, 10 µM eptifibatide, or 5 µM warfarin. Drugs and E3 were  
595 replaced on days 0, 2, and 4 days post infection (DPI) unless otherwise stated.

596



597 *Tail wound thrombosis assay*

598 Three day post fertilisation (DPF) embryos were treated over-night with anti-platelet drugs.  
599 They were anaesthetised, and then a small amount of their tail was removed with a scalpel.  
600 Embryos were imaged 4 hours post wounding and the number of GFP positive cells within  
601 100 µm of the cut site was counted.

602

603 *Imaging*

604 Live zebrafish embryos were anaesthetized in M-222 (Tricaine) and mounted in 3%  
605 methylcellulose for imaging on a Leica M205FA or DM6000B fluorescence  
606 stereomicroscope. Image analysis was carried out with Image J Software Version 1.51j using  
607 fluorescent pixel counts and intensity measurements as previously described (Matty et al.,  
608 2016).

609

610 *Axenic culture*

611 A midlog culture of fluorescent *M. marinum* was diluted 1:100 and aliquoted into 96 well  
612 plates for drug treatment. Cultures were maintained at 28°C in a static incubator and bacterial  
613 fluorescence was measured in a plate reader.

614

615 *Morpholinos:*

616 Embryos were injected at the single cell stage with 1 pmol  
617 cMPL (5'-CAGA ACTCTCACCTTCAATTATAT-3'),  
618 or control morpholino (5'-CCTCTTACCTCAGTTACAATTTATA-3').

619

620 *Clodronate liposome injections:*

621 Larvae were injected at 3 DPI (4 DPF) with 10 nl of 5 mg/ml clodronate liposomes or 5  
622 mg/ml PBS vehicle liposomes by caudal vein injection.

623

624 *Oil-red O:*

625 Oil Red O lipid staining on whole mount embryos was performed and analysed as previously  
626 described (Johansen et al., 2018; Passeri et al., 2009). Briefly, embryos were individually  
627 imaged for bacterial distribution by fluorescent microscopy, fixed, and stained in Oil Red O  
628 (0.5% w/v in propylene glycol). Oil Red O density was calculated by using the ‘measure’  
629 function in Image J, and subtracting the mean brightness of a representative region within  
630 each granuloma from the mean brightness of a representative adjacent ‘background’ region.

631

632 *Statistics*

633 All t-tests were unpaired t-tests with Welch’s correction. All ANOVA were ordinary one-way  
634 ANOVA, comparing the mean of each group with the mean of every other group, using  
635 Turkey’s multiple comparisons test with a single pooled variance. In cases where data was  
636 pooled from multiple experiments, data from each was normalised to its own  
637 within-experiment control (usually ‘DMSO’) before pooling. Outliers were removed using  
638 ROUT, with Q=1%.

639



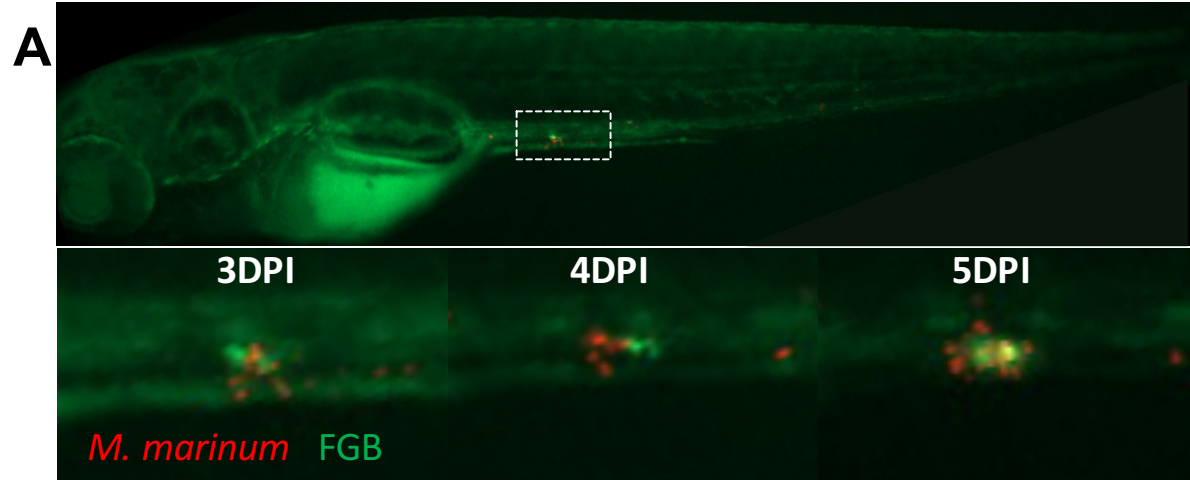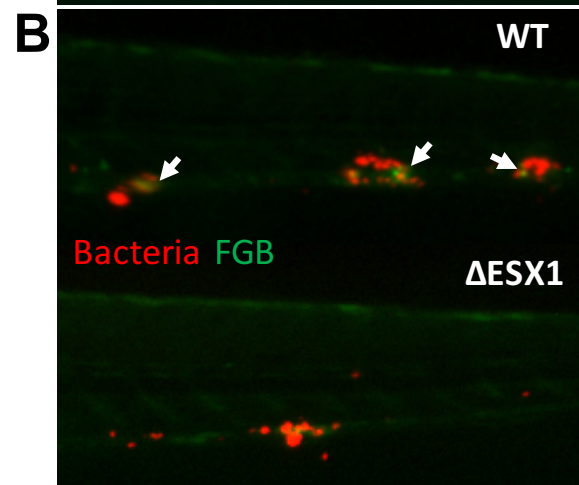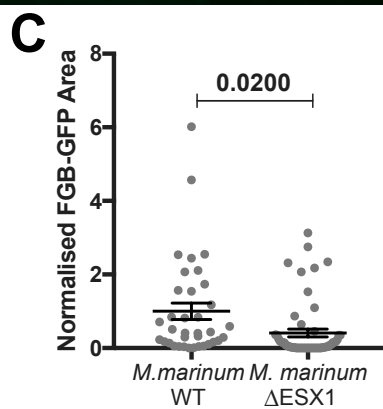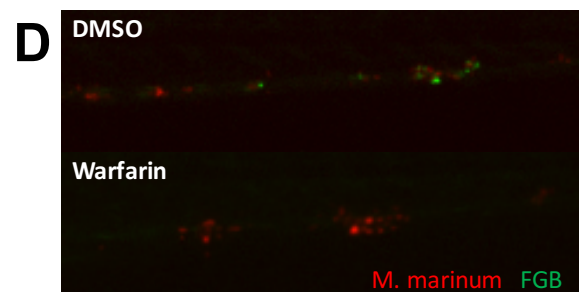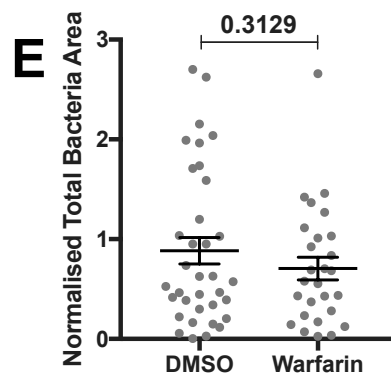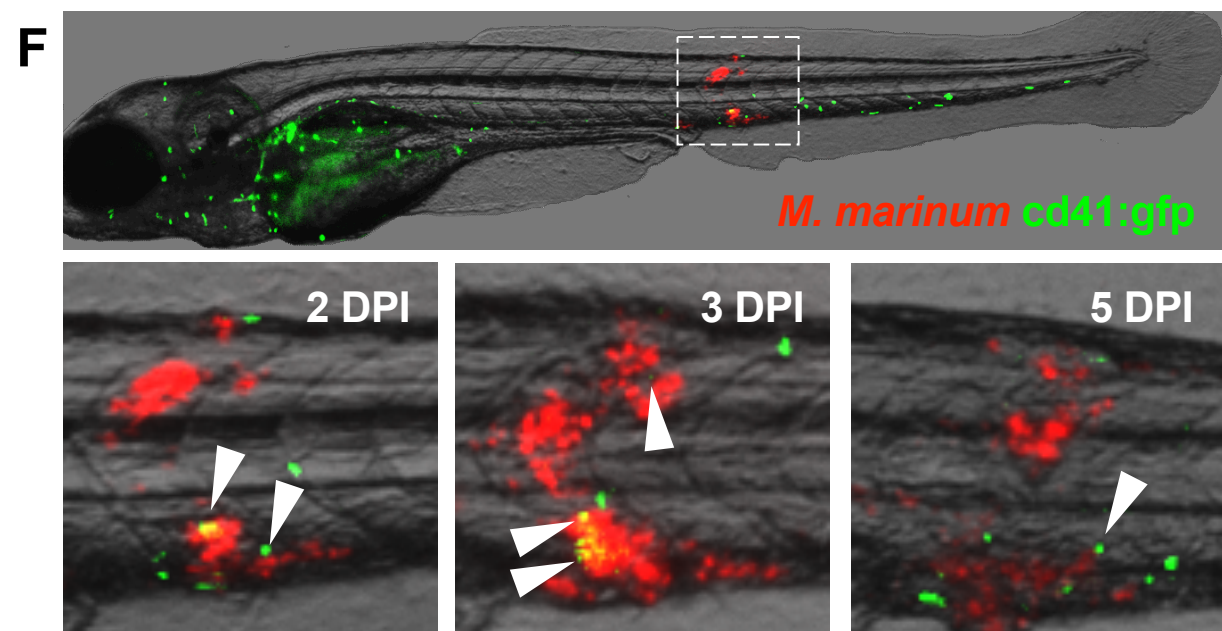

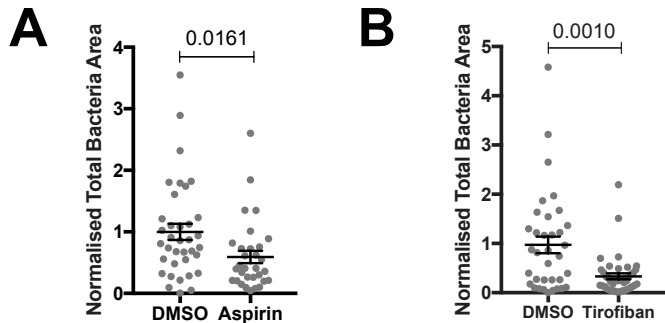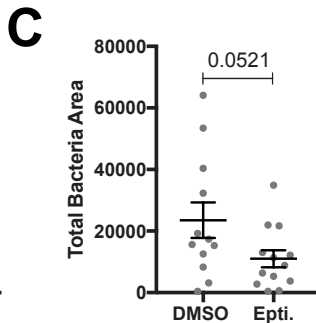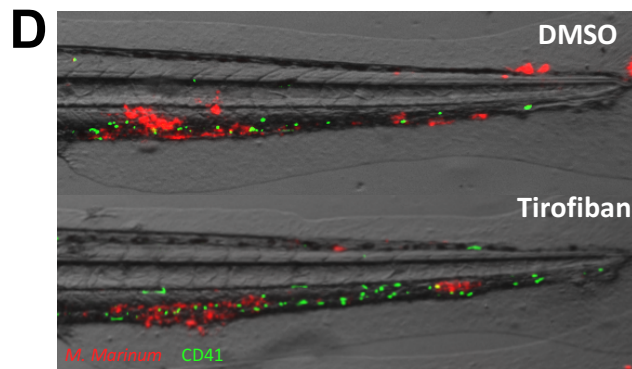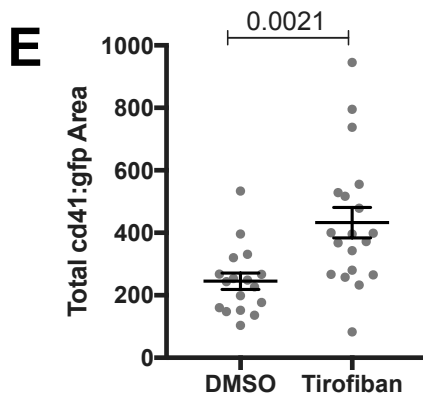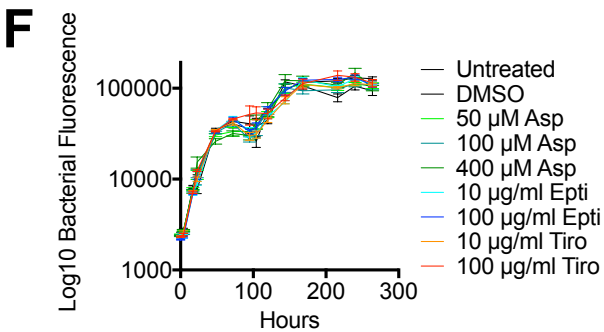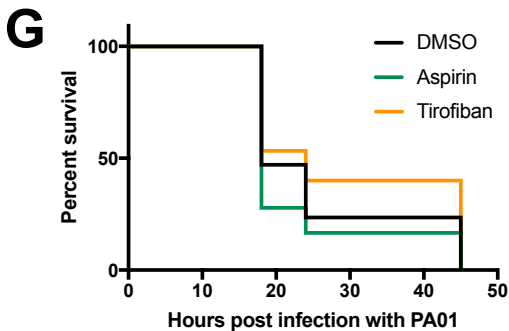

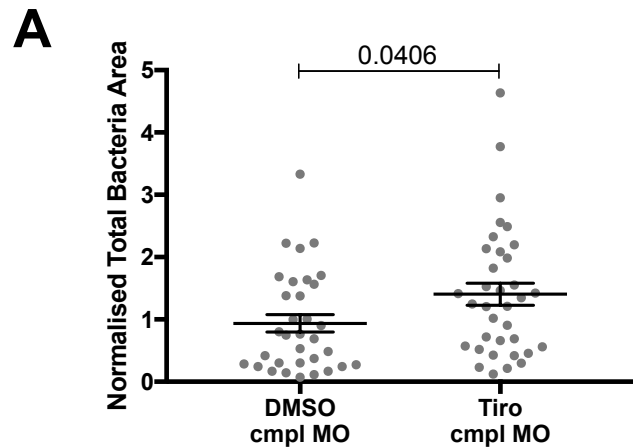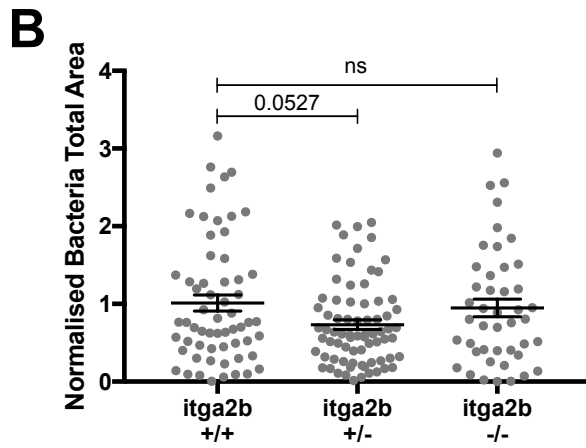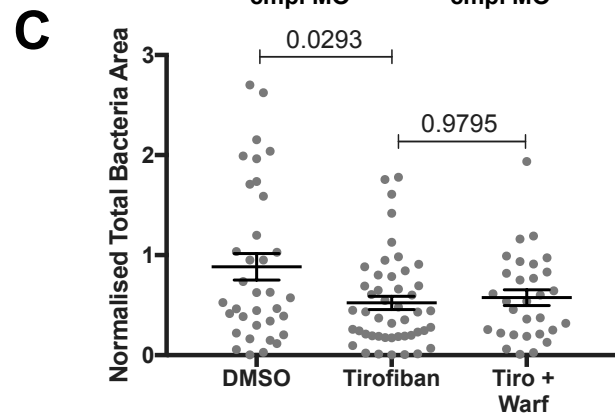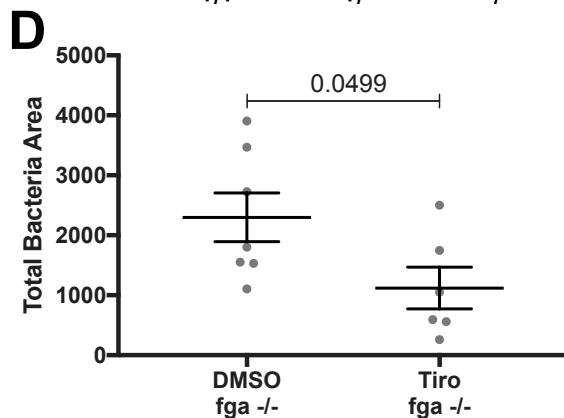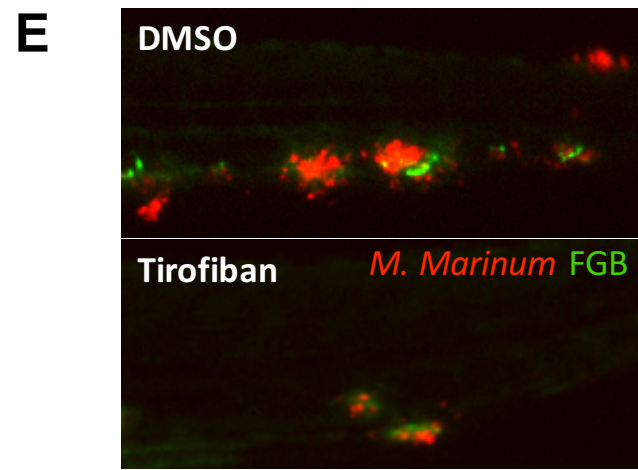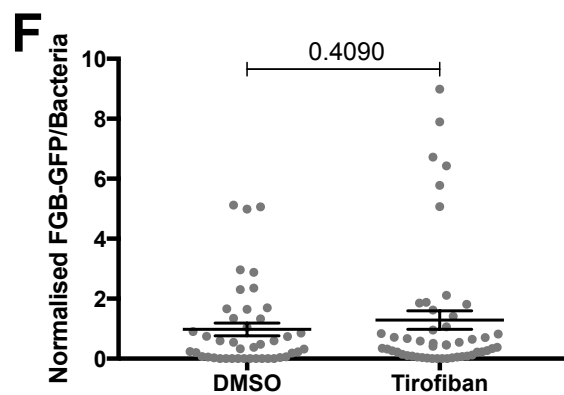

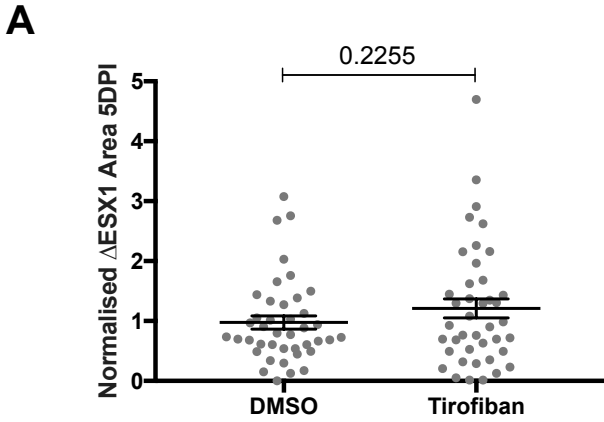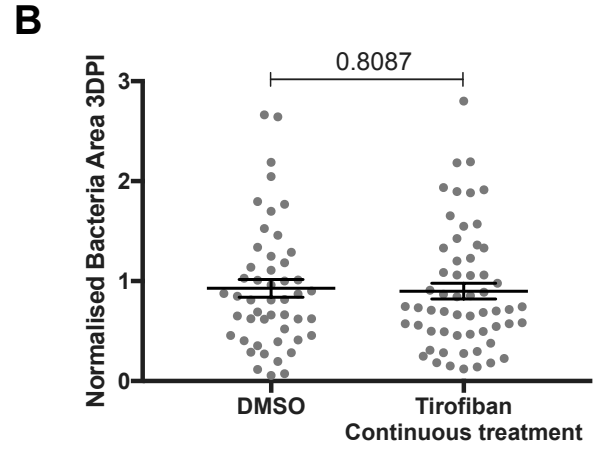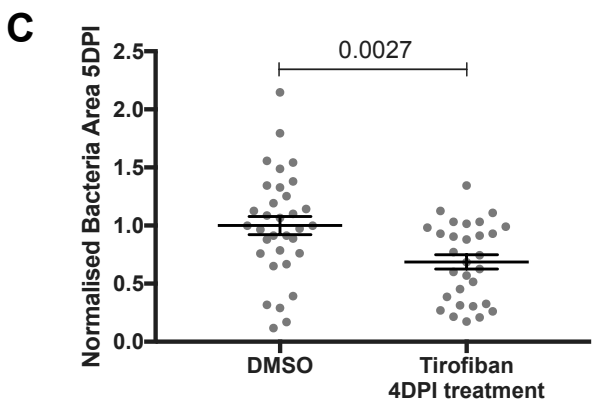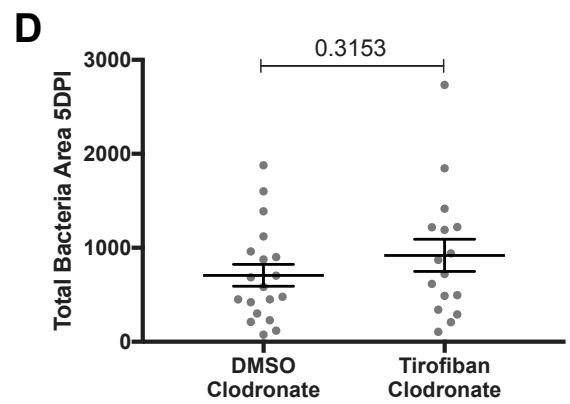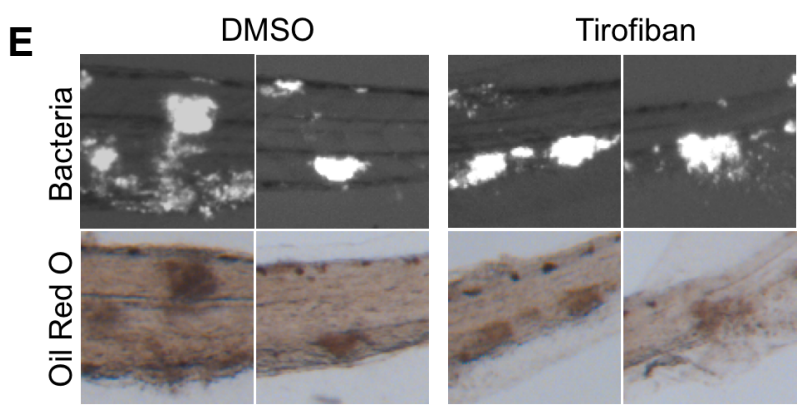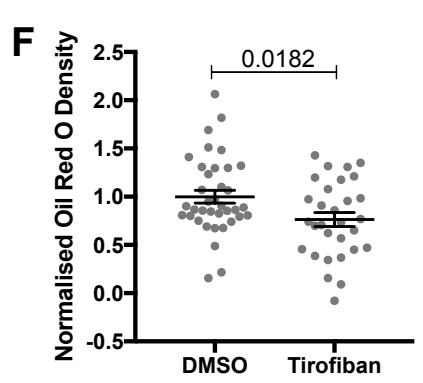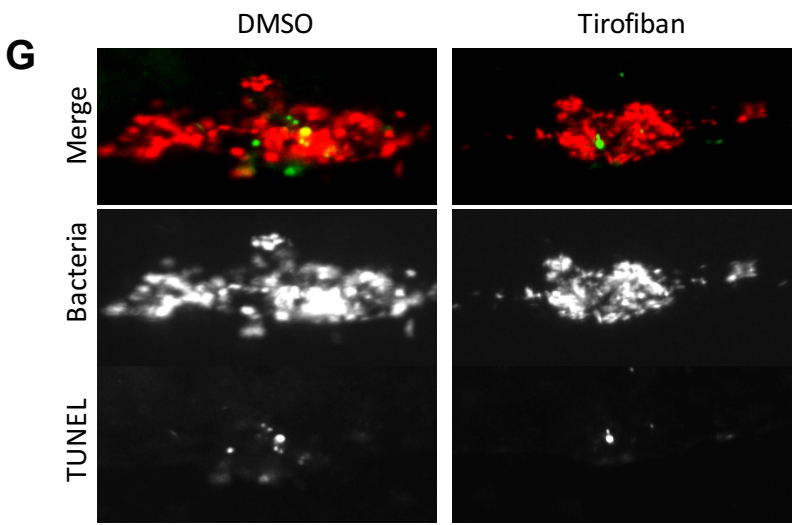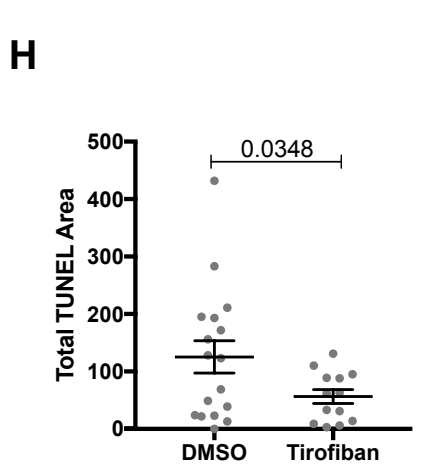

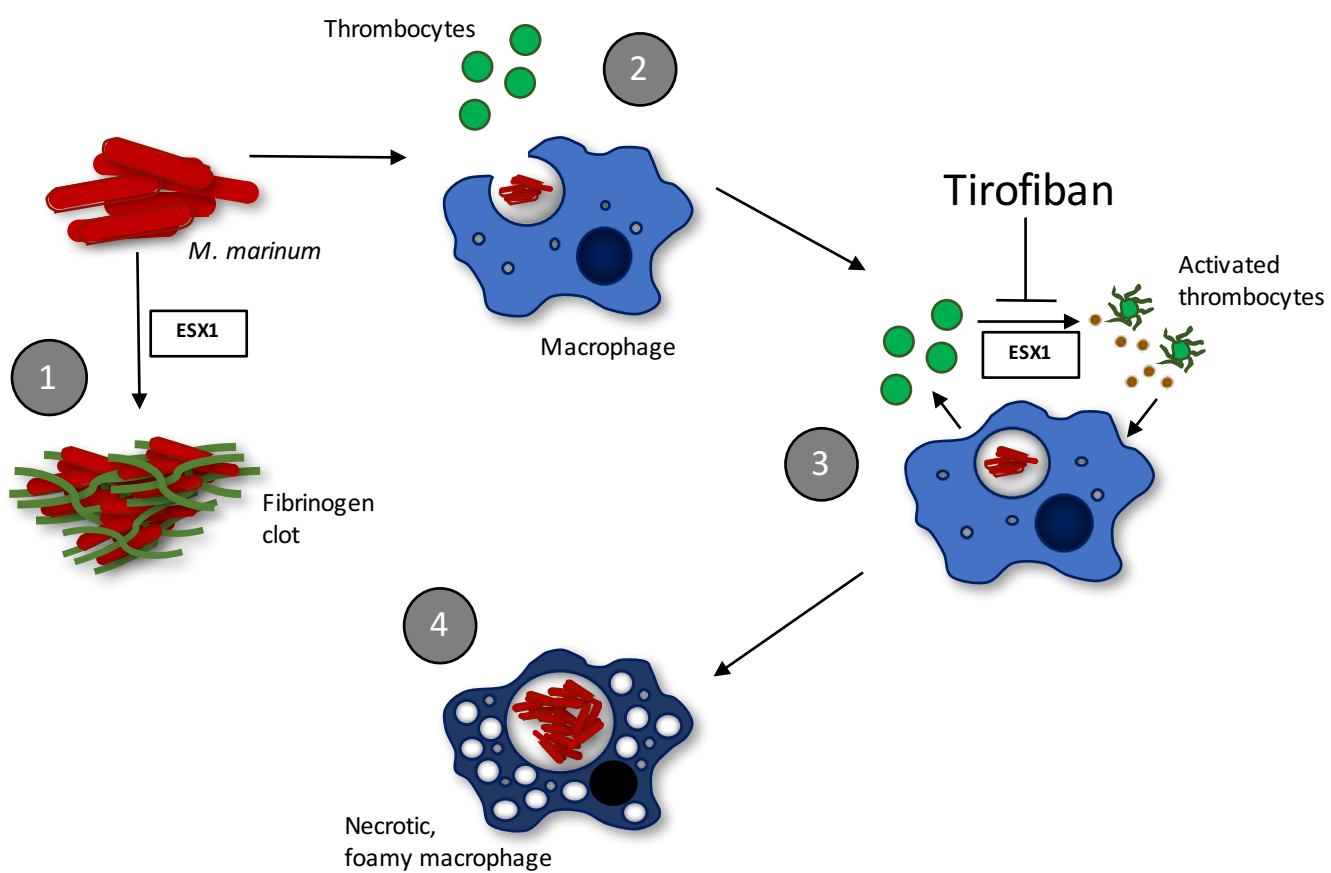





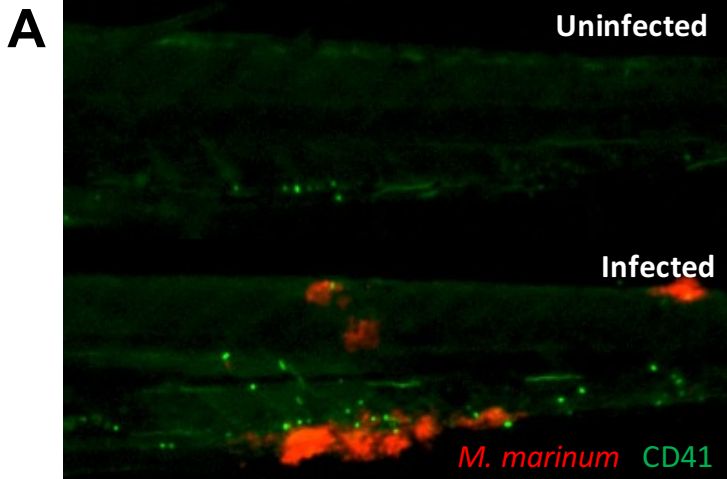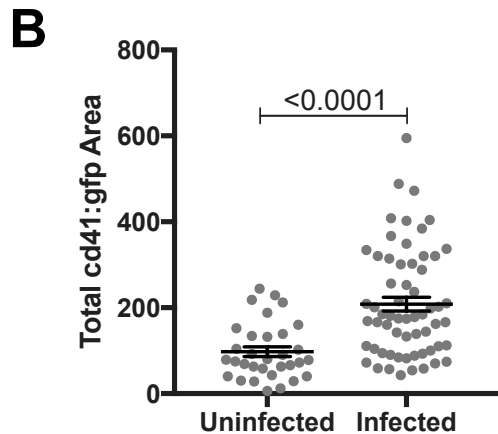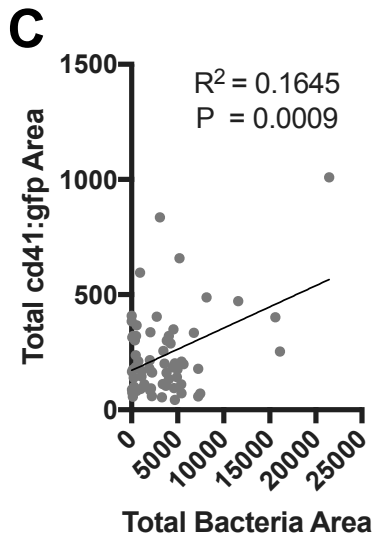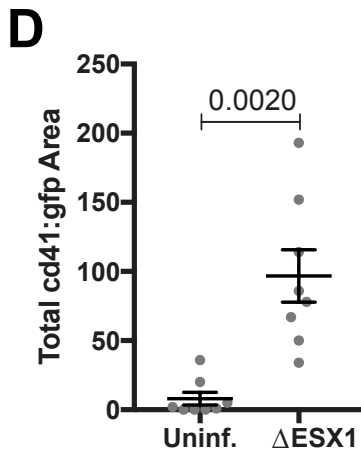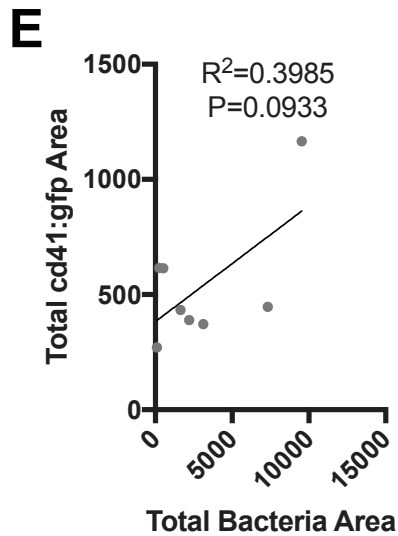

**Fish**

1

2

3

4

5

6

7

8

9

10

11

12

13

14

**2DPI**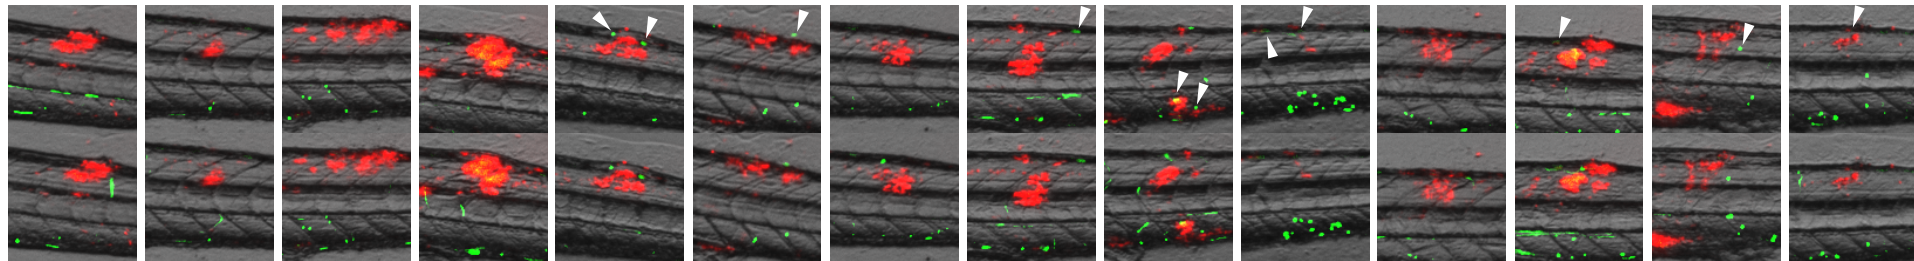**3DPI**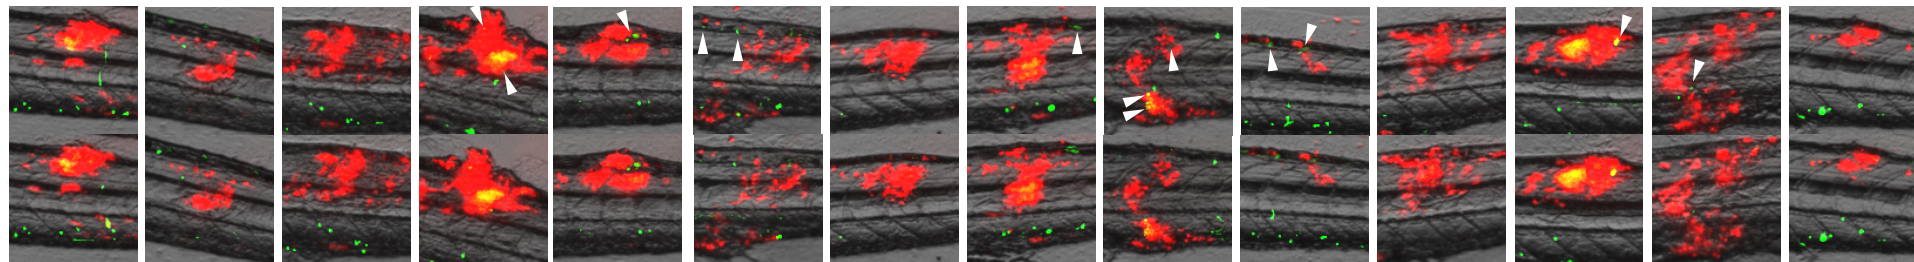**4DPI**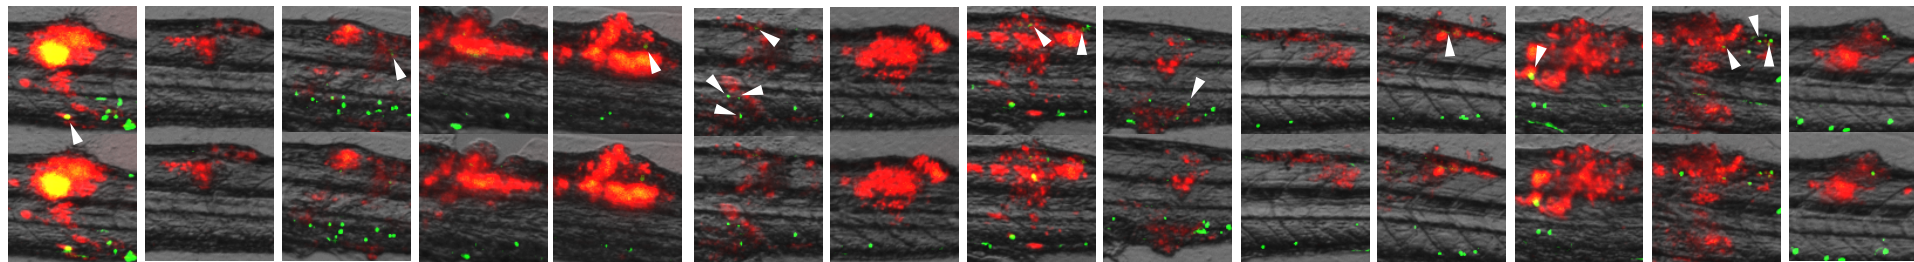

**A**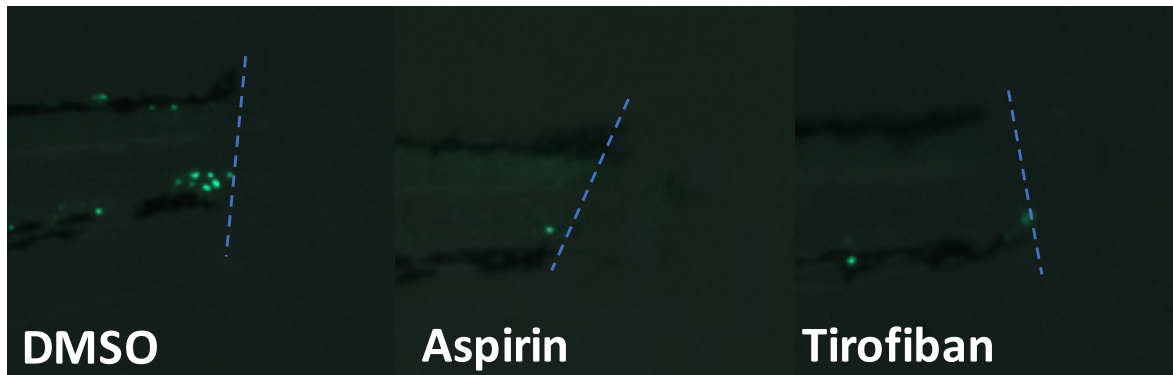**B**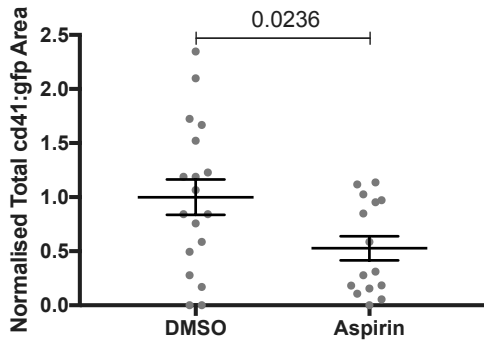**C**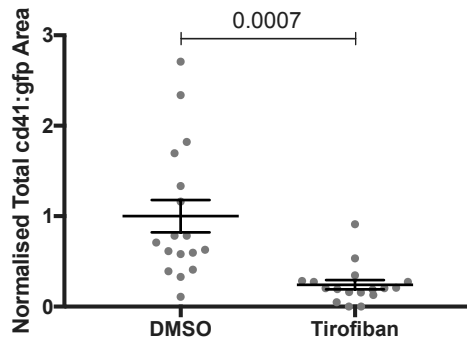

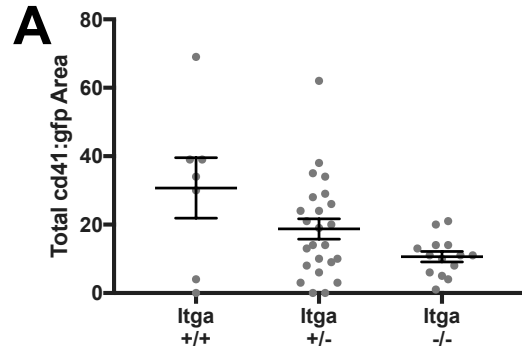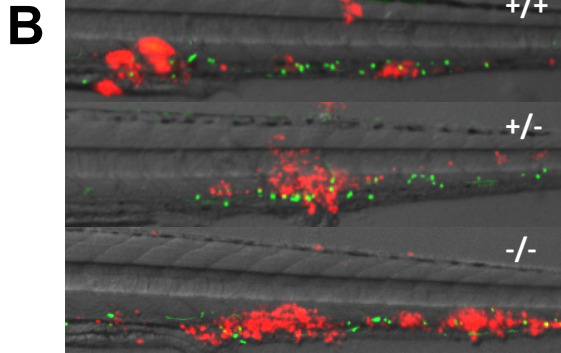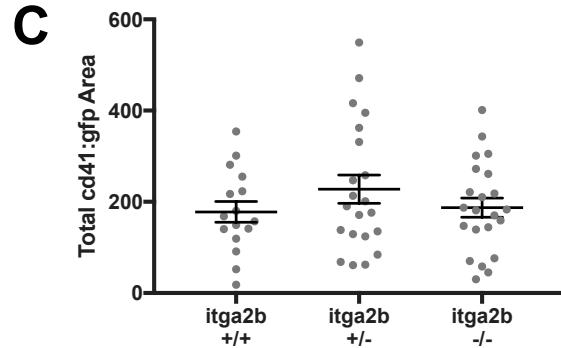

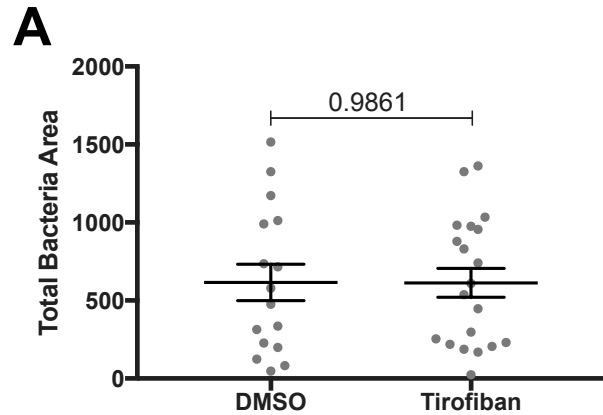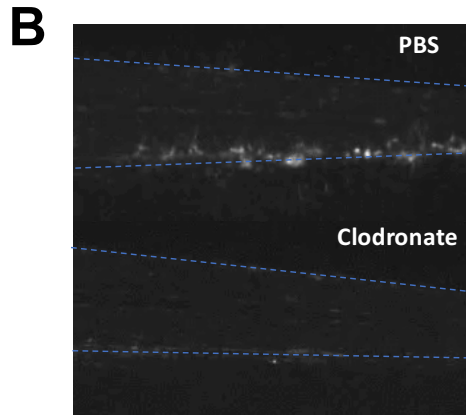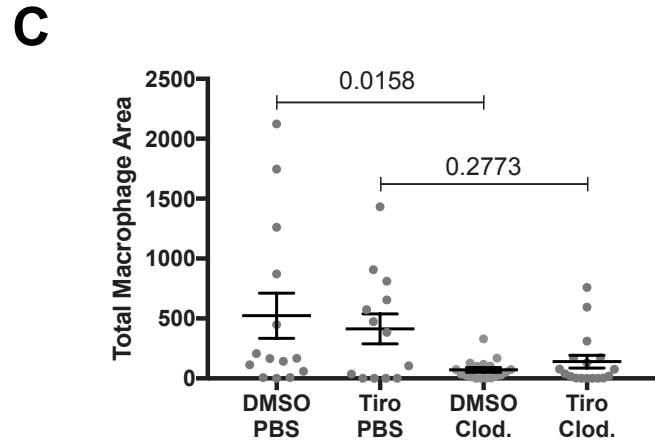

Source: https://www.biorxiv.org/content/10.1101/338111v2.full.pdf
